# Supplementary material for: The lncRNA RZE1 Controls Cryptococcal Morphological Transition
Source: PLoS Genet. 2015 Nov 20;11(11):e1005692. doi: 10.1371/journal.pgen.1005692 (PMC4654512; doi:10.1371/journal.pgen.1005692)
Supplement: S3 Table — (XLSX) [file pgen.1005692.s011.xlsx]

## Sheet: Actin transcript count
WT (XL280) ACT1 expression	Total number of cells	No. cells ACT1 is observed		rze1∆ ACT1 expression	Total no. of cells	No. of cells ACT1 is observed
	25	12			50	21
	79	49			51	31
	92	33			101	50
	97	58			51	38
	58	23			60	36
	85	50			72	45
	65	36			73	36
	109	105			66	49
	127	78			71	38
	147	111			60	39
					71	49
Total	884	555			51	31
% cells expressing		62.7828			72	35
					50	36
		1-7 transcripts/cell
		1-2 nuclear; 1-5 cytoplasmic		Total	899	534
				% cells expressing		59.3993
						1-6 transcripts/cell
						1-2 nuclear: 1-4 cytoplasmic

## Sheet: ZNF2 transcript Count
WT ZNF2 expression	Total no. of cells	No. of cells ZNF2 is observed	Nuclear	Cytoplasmic		rze1∆- ZNF2 expression	Total no. of cells	No. of cells ZNF2 is observed	Nuclear	Cytoplasmic
	15	8	0	3			80	33	1	1
	16	7	1	0			65	22	1	1
	14	8	0	1			86	26	1	0
	22	11	0	2			69	26	0	2
	42	32	0	1			96	36	1	1
	35	28	1	0			77	35	3	3
	57	27	0	1			74	43	1	1
	83	34	0	1			51	31	0	1
	79	37	1	2			66	40	0	1
	70	32	1	1					0	1
	68	27	0	1		Total	664	292	1	0
	43	25	0	1					0	1
	68	25	0	1		% cells expressing		43.9759	2	0
			2	1					2	1
Total	612	301	0	1					1	1
			1	2					0	1
% cells expressing		49.183	0	1					1	0
			1	1					1	1
			0	1					0	1
			1	1					1	1
			1	0					0	2
			0	2					0	2
			0	1					1	0
			0	4					1	0
			2	0					2	2
			0	2					0	1
			1	1					0	1
			1	1					1	1
			1	2					0	1
			2	0					1	1
			0	1					1	0
			1	0					2	1
			2	0					0	2
			0	1					0	3
			0	4					1	0
			0	2					1	0
			0	4					0	1
			2	2					0	1
			1	0					1	0
			1	3					0	1
			0	1					0	1
			0	3					1	0
			0	1					1	0
			1	0					1	0
			0	2					1	0
			0	1					0	1
			2	0					3	0
			0	1					1	0
			1	2					1	0
			0	1					0	1
			3	0					0	1
			0	1					1	0
			2	0					0	1
			0	1					1	2
			0	3					1	1
			0	1					0	1
			1	1					1	0
			1	0					0	1
			0	1					1	2
			1	2					1	1
			1	1					0	2
			1	2					2	2
			1	2					2	0
			1	3					2	1
			1	0					2	0
			1	0					0	2
			0	2					0	1
			0	2					1	0
			1	0					0	2
			1	1					1	1
			0	1					1	1
			1	0					2	1
			0	2					2	0
			2	1					1	3
			1	2					2	0
			1	1					1	1
			1	2					1	2
			2	5					2	1
			2	2					0	2
			0	2					1	0
			0	2					0	1
			1	0					1	0
			0	2					0	2
			2	3					0	1
			1	3					0	2
			1	1					1	0
			1	4					2	1
			0	1					1	0
			1	1					2	1
			0	1					0	2
			0	1					1	0
			0	3					3	1
			0	2					1	1
			1	1					1	0
			0	1					0	1
			0	1					1	0
			0	1					2	2
			1	2					2	0
			0	1					0	1
			1	1					0	1
			0	2					1	0
			2	3					2	0
			1	3					2	0
			3	2					0	2
			2	0					0	2
			2	2					1	0
			0	1					1	1
			1	4					1	0
			0	1					2	2
			1	1					1	3
			2	2					0	1
			2	2					2	1
			1	0					2	0
			1	0					1	0
			1	1					1	3
			0	2					1	2
			2	0					1	1
			0	1					0	1
			2	3					0	1
			1	0					2	2
			0	2					1	2
			1	0					1	1
			0	2					1	2
			0	1					0	2
			0	2					0	1
			0	2					0	1
			1	1					1	1
			0	1					2	1
			0	2					1	1
			0	2					3	1
			2	0					2	0
			2	1					2	2
			0	3					1	1
			1	2					1	0
			0	2					3	1
			1	1					2	0
			0	1					2	0
			2	2					0	1
			2	2					1	1
			1	4					0	1
			0	1					1	0
			1	2					2	2
			0	1					2	2
			2	1					0	2
			0	4					2	1
			0	2					4	2
			0	1					0	2
			0	1					1	1
			2	2					2	0
			2	0					0	1
			0	1					1	2
			1	2					2	1
			0	1					2	0
			0	1					1	0
			2	3					1	1
			0	1					1	1
			2	2					2	3
			0	2					1	1
			0	2					3	1
			0	1					0	1
			0	1					3	0
			2	1					1	1
			0	1					1	1
			3	4					2	0
			0	1					4	1
			1	2					2	1
			2	2					0	1
			1	2					2	1
			1	1					0	1
			1	2					2	1
			0	1					1	1
			1	1					2	0
			0	1					2	0
			0	1					2	0
			1	2					1	0
			1	1					1	1
			0	1					1	2
			1	4					1	1
			0	2					4	3
			0	1					1	0
			0	1					3	3
			0	2					1	2
			0	2					5	3
			0	2					1	0
			0	1					1	0
			0	2					2	1
			0	3					3	2
			2	4					1	0
			2	1					1	1
			2	4					2	1
			1	2					1	2
			0	3					1	1
			0	1					1	0
			2	3					1	1
			1	3					3	1
			0	1					1	0
			0	1					1	1
			0	2					1	0
			0	3					3	2
			0	1					2	0
			2	2					1	2
			0	1					2	1
			0	3					1	0
			0	3					3	3
			0	2					1	3
			1	1					2	0
			1	2					1	0
			0	1					3	0
			2	1					1	0
			0	1					1	0
			0	2					2	2
			0	1					1	0
			0	1					1	1
			0	1					2	3
			0	1					2	0
			1	0					1	1
			0	1					1	0
			0	1					2	1
			0	3					0	1
			0	1					1	0
			0	1					0	1
			0	1					3	1
			0	1					1	0
			0	2					0	3
			0	1					1	0
			1	3					2	0
			0	1					2	0
			0	1					2	1
			0	1					1	2
			2	0					0	2
			1	1					3	0
			0	1					2	0
			2	3					2	0
			1	1					1	1
			2	3					1	1
			3	2					2	1
			2	4					1	1
			2	2					0	1
			1	1					3	1
			0	1					1	0
			0	1					0	1
			0	1					4	3
			0	4					2	2
			1	0					0	1
			0	2					1	0
			1	4					1	0
			1	2					2	0
			0	2					1	4
			0	2					2	0
			0	2					1	0
			0	2					1	0
			0	1					1	1
			0	2					1	1
			1	2					2	3
			1	1					1	2
			0	1					2	3
			2	1					1	0
			0	1					1	0
			2	1					3	2
			0	1					0	2
			0	2					1	1
			1	1					0	1
			0	1					1	1
			0	1					3	3
			1	0					1	1
			1	1					1	1
			2	0					3	0
			1	1					1	0
			1	0					0	2
			0	1					2	0
			1	3					2	2
			1	2					3	0
			0	1					0	1
			0	2					1	0
			1	0					2	3
			1	2					5	5
			0	2					1	3
			0	1					2	1
			0	2					2	2
			0	2					3	0
			0	3					3	3
			1	1					1	0
			1	0					1	0
			0	2					1	0
			0	2					1	1
			0	4					1	0
			1	0					2	2
			1	0					1	1
			0	2					0	1
			4	4					1	0
			1	1					1	1
			0	2					1	1
			1	0
			0	1				Total	358	290
			1	0
			0	1				% transcripts	55.2469	44.7531
			1	0
			0	1
			0	2
			2	2
			3	3
		Total	199	455
		% transcripts	30.4281	69.5719

## Sheet: RZE1 transcript count
WT RZE1 expression	Total no. of cells	No. of cells expressing	Nuclear	Cytoplasmic
	31	10	2	0
	46	25	1	0
	20	5	0	1
	28	12	1	0
	45	12	1	0
	81	13	1	0
	100	18	1	1
	78	18	1	0
	48	14	1	0
	17	3	0	1
	20	4	1	0
			0	1
			1	0
Total	514	134	1	0
			1	0
% cells expressing		26.07	1	0
			0	1
			0	1
			0	1
			3	1
			0	1
			1	0
			0	2
			1	0
			1	0
			2	0
			0	1
			0	1
			0	1
			1	0
			1	0
			1	0
			1	0
			1	0
			1	0
			2	0
			2	0
			2	0
			1	0
			1	0
			1	1
			0	2
			1	0
			0	1
			1	1
			1	0
			2	0
			1	0
			1	1
			0	1
			2	0
			2	1
			1	1
			2	1
			1	1
			1	1
			1	0
			0	1
			1	0
			3	1
			0	1
			0	1
			1	1
			1	0
			1	1
			2	1
			2	1
			1	1
			1	0
			2	0
			1	1
			2	0
			0	1
			1	0
			1	0
			2	1
			1	0
			1	0
			2	1
			1	1
			2	1
			2	0
			0	1
			1	1
			3	0
			0	2
			1	1
			1	0
			2	0
			0	1
			1	0
			1	0
			1	0
			1	1
			2	0
			1	0
			1	0
			0	1
			2	1
			1	0
			1	0
			1	0
			3	0
			2	0
			1	1
			1	0
			1	1
			1	0
			1	0
			3	0
			1	1
			2	0
			1	1
			0	1
			1	0
			1	0
			1	0
			1	0
			1	0
			1	0
			1	0
			2	1
			1	1
			1	1
			1	0
			2	0
			1	0
			2	1
			1	0
			2	1
			1	1
			1	0
			1	0
			1	0
			147	61
			70.6731	29.3269
