# Supplementary material for: The lncRNA RZE1 Controls Cryptococcal Morphological Transition
Source: PLoS Genet. 2015 Nov 20;11(11):e1005692. doi: 10.1371/journal.pgen.1005692 (PMC4654512; doi:10.1371/journal.pgen.1005692)
Supplement: S4 Table — (DOCX) [file pgen.1005692.s012.docx]

| **Strain name** | **Genotype** | **Source and comments** |
| --- | --- | --- |
| XL280α | Wild type | [[1](#_ENREF_1)] |
| AIJ18 | Wild type, Congenic pair of XL280α | [[2](#_ENREF_2)] |
| KN99α | Wild type | [[3](#_ENREF_3)] |
| KN99**a** | Wild type, Congenic pair of KN99α | [[3](#_ENREF_3)] |
| JEC20**a** | Wild type, Congenic pair of JEC21α | [[4](#_ENREF_4),[5](#_ENREF_5)] |
| LW87 | P*GPD1-CFL1*-NEOr | [[6](#_ENREF_6)] |
| XL9421 | *mat2*::*NAT*r | [[7](#_ENREF_7)] |
| XL1601α2 | *znf2*::*NEO*r | [[7](#_ENREF_7)] |
| XL1637**a**2 | *znf2*:: *NEO*r | [[7](#_ENREF_7)] |
| LW25α1 | *rze1*::*NAT*r P*GPD1-ZNF2*-*NEO*r | This study |
| X261α1 | *rze1*::Tn-*NAT*r | This study |
| NC36α1 | *rze1*::Tn-*NAT*r P*RZE1-RZE1*-*NEO*r | This study |
| NC01α1 | *rze1*::*NAT*r | This study |
| NC02**a**1 | *rze1*::*NAT*r | This study |
| NC08α1 | *rze1*::*NAT*r P*CTR4-2-ZNF2*-*NEO*r | This study |
| NC09α1 | *rze1*:: *NAT*r P*GPD1*-*RZE1*-*NEO*r | This study |
| NC43α1 | *rze1*::*NAT*r P*CTR4-2-RZE1*-*NEO*r | This study |
| NC10α1 | *rze1*:: *NAT*r  P*RZE1*-*RZE1*-*NEO*r | This study |
| NC12**a**2 | *rze1*::*NAT*r | This study |
| NC132 | *rze1*::*NAT*r | This study |
| NC14α2 | *rze1*:: *NAT*r  P*RZE1*-*RZE1*-*NEO*r | This study |
| NC 18 α/**a**2 | *rze1:: NAT*r  *ZNF2*-*NEO*r diploid | This study |
| NC21α2 | *rze1*:: *NAT*r  *znf2*:: *NEO*r | This study |
| NC23α1 | *rze1*::*NAT*r *RZE1*ATG4-*NEO*r | This study |
| NC26α1 | *rze1*::*NAT*r *RZE1*ATG1- *NEO*r | This study |
| NC31α1 | *rze1*::*NAT*r *RZE1*ATG2- *NEO*r | This study |
| XX9α2 | P*CTR4-2*-*ZNF2*::*mCherry*-*NEO*r | Unpublished |
| NC40α2 | *rze1*::*NAT*r P*CTR4-2*-*ZNF2*-*mCherry*-*NEO*r | This study |
| NC41α1 | *rze1*::*NAT*r *RZE1*ATG3-*NEO*r | This study |
| NC42 α1 | *rze1*::*NAT*r *RZE1*ATG5-*NEO*r | This study |
| YZ01α1 | *rze1*::*NAT*r P*GPD1*-*CDS1*-*NEO*r | This study |
| YZ02α1 | *rze1*::*NAT*r P*GPD1*-*CDS2*- *NEO*r | This study |
| YZ03α1 | *rze1*::*NAT*r P*GPD1*-*CDS3*-*NEO*r | This study |
| YZ04α1 | *rze1*::*NAT*r P*GPD1*-*CDS4*-*NEO*r | This study |
| YZ05α1 | *rze1*::*NAT*r P*GPD1*-*CDS5*-*NEO*r | This study |
| YZ06α1 | *rze1*::*NAT*r P*CTR4-2*-*CDS1*-*HYG*r | This study |
| YZ07α1 | *rze1*::*NAT*r P*CTR4-2*-*CDS2*-*HYG*r | This study |
| YZ08α1 | *rze1*::*NAT*r P*CTR4-2*-*CDS3*-*HYG*r | This study |
| YZ09α1 | *rze1*::*NAT*r P*CTR4-2*-*CDS4-HYG*r | This study |
| YZ10α1 | *rze1*::*NAT*r:: P*CTR4-2*-*CDS5*- *HYG*r | This study |
| NC44α1 | *rze1*:: *NAT*r  *RZE1*-*NEO*r | This study |
| NC45 α1 | *rze1*:: *NAT*r  *ura5* | This study |
| NC46α1 | *rze1*:: *NAT*r  *ura5* pPM8-*RZE- URA5* | This study |
| XL904α1 | *znf2::NAT ZNF2-NEO* | This study |
| XL1643α2 | *znf2::NEO ZNF2-NAT* | This study |

Note: 1 strains in XL280 background; 2 strains in in H99 background

1. Lin X, Huang JC, Mitchell TG, Heitman J (2006) Virulence attributes and hyphal growth of *C. neoformans* are quantitative traits and the *MATα* allele enhances filamentation. PLoS Genet 2: e187.

2. Zhai B, Zhu P, Foyle D, Upadhyay S, Idnurm A, et al. (2013) Congenic strains of the filamentous form of *Cryptococcus neoformans* for studies of fungal morphogenesis and virulence. Infect Immun 81: 2626-2637.

3. Nielsen K, Cox GM, Wang P, Toffaletti DL, Perfect JR, et al. (2003) Sexual cycle of *Cryptococcus neoformans* var. *grubii* and virulence of congenic a and *α* Isolates. Infect Immun 71: 4831-4841.

4. Kwon-Chung KJ, Kozel TR, Edman JC, Polacheck I, Ellis D, et al. (1992) Recent advances in biology and immunology of *Cryptococcus neoformans*. J Med Vet Mycol 30: 133-142.

5. Heitman J, Allen B, Alspaugh JA, Kwon-Chung KJ (1999) On the origins of congenic *MAT*α and *MAT*a strains of the pathogenic yeast *Cryptococcus neoformans*. Fungal Genet Biol 28: 1-5.

6. Wang L, Zhai B, Lin X (2012) The link between morphotype transition and virulence in *Cryptococcus neoformans*. PLoS Pathog 8: e1002765.

7. Lin X, Jackson JC, Feretzaki M, Xue C, Heitman J (2010) Transcription factors Mat2 and Znf2 operate cellular circuits orchestrating opposite- and same-sex mating in *Cryptococcus neoformans*. PLoS Genet 6: e1000953.
